# Supplementary material for: Effects of placebos without deception compared with no treatment: protocol for a systematic review and meta-analysis
Source: HighWire-hosted journal article supplement (doi:10.1136/bmjopen-2015-009428), 2015-11-01
Supplement: bmjopen-2015-009428supp.pdf [file bmjopen-2015-009428supp.pdf]

## **Appendix 1. Search Strategy**

#1) placebo\* and (told or nondecept\* or "non decept\*" or nonconceal\* or "non conceal\*" or nonblind\* or "non blind\*" or "without deception" or "without conceal\*" or "without blind\*"):ti (Word variations have been searched)

#2) placebo\* near (told or nondecept\* or "non decept\*" or nonconceal\* or "non conceal\*" or nonblind\* or "non blind\*" or "without deception" or "without conceal\*" or "without blind\*"):ti,ab,kw (Word variations have been searched)

#3) "open placebo\*" or "open label placebo\*":ti,ab,kw (Word variations have been searched)

#4) #1 or #2 or #3
